# Supplementary material for: In situ adsorbent formation based dispersive micro-solid phase extraction using a deep eutectic solvent as an elution solvent for the extraction of some pesticides from honey samples prior to GC-MS analysis
Source: Royal Society of Chemistry journal article supplement (doi:10.1039/d1ay01182k), 2021-01-01
Supplement: d1ay01182k1.pdf [file d1ay01182k1.pdf]

1 **Supplementary data**

2 **In situ adsorbent formation based dispersive micro solid phase extraction using a deep eutectic**  
3 **solvent as an elution solvent for the extraction of some pesticides from honey samples prior to GC-**  
4 **MS analysis**

5  
6 Elnaz Marzi Khosrowshahi<sup>1</sup>, Mahboob Nemati<sup>1,2</sup>, Mir Ali Farajzadeh<sup>3,4</sup>, Mohammad Reza Afshar  
7 Mogaddam<sup>1,2,\*</sup>

8 <sup>1</sup> *Food and Drug Safety Research Center, Tabriz University of Medical Sciences, Tabriz, Iran*

9 <sup>2</sup> *Pharmaceutical Analysis Research Center and Faculty of Pharmacy, Tabriz University of Medical*  
10 *Sciences, Tabriz Iran*

11 <sup>3</sup> *Department of Analytical Chemistry, Faculty of Chemistry, University of Tabriz, Tabriz, Iran*

12 <sup>4</sup> *Engineering Faculty, Near East University, 99138 Nicosia, North Cyprus, Mersin 10, Turkey*

13  
14 \*Corresponding author: Dr. M.R. Afshar Mogaddam

15 Tel.: +98 41 33372250

16 Fax: +98 41 31773336

17 Email addresses: mr.afsharmogaddam@yahoo.com; Afsharmogaddam@tbzmed.ac.ir

18

19

20

21

22

23

24

25

26

| Table S1. Chemical structures and physicochemical properties of the analytes |                                                                              |                  |                                                                                       |             |
|------------------------------------------------------------------------------|------------------------------------------------------------------------------|------------------|---------------------------------------------------------------------------------------|-------------|
| Analytes                                                                     | Molecular formula                                                            | Molecular weight | Structure                                                                             | Log p       |
| <u>Diazinon</u>                                                              | <u>C<sub>12</sub>H<sub>21</sub>N<sub>2</sub>O<sub>3</sub>PS</u>              | <u>304.35</u>    | 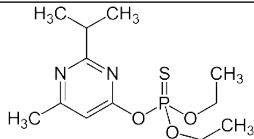   | <u>3.8</u>  |
| <u>Isazofos</u>                                                              | <u>C<sub>9</sub>H<sub>17</sub>ClN<sub>3</sub>O<sub>3</sub>PS</u>             | <u>313.74</u>    |    | <u>3.9</u>  |
| <u>Chlorthiophos</u>                                                         | <u>C<sub>11</sub>H<sub>15</sub>Cl<sub>2</sub>O<sub>3</sub>PS<sub>2</sub></u> | <u>361.2</u>     |    | <u>5.8</u>  |
| <u>Chloropyrifos</u>                                                         | <u>C<sub>9</sub>H<sub>11</sub>Cl<sub>3</sub>NO<sub>3</sub>PS</u>             | <u>350.6</u>     |    | <u>4.96</u> |
| <u>Fenthion</u>                                                              | <u>C<sub>10</sub>H<sub>15</sub>O<sub>3</sub>PS<sub>2</sub></u>               | <u>278.3</u>     |   | <u>4.1</u>  |
| <u>Piperophos</u>                                                            | <u>C<sub>14</sub>H<sub>28</sub>NO<sub>3</sub>PS<sub>2</sub></u>              | <u>353.5</u>     |  | <u>4.2</u>  |
| <u>Anilofos</u>                                                              | <u>C<sub>13</sub>H<sub>19</sub>ClNO<sub>3</sub>PS<sub>2</sub></u>            | <u>367.9</u>     |  | <u>3.8</u>  |

27

28

29

30

31

32

33

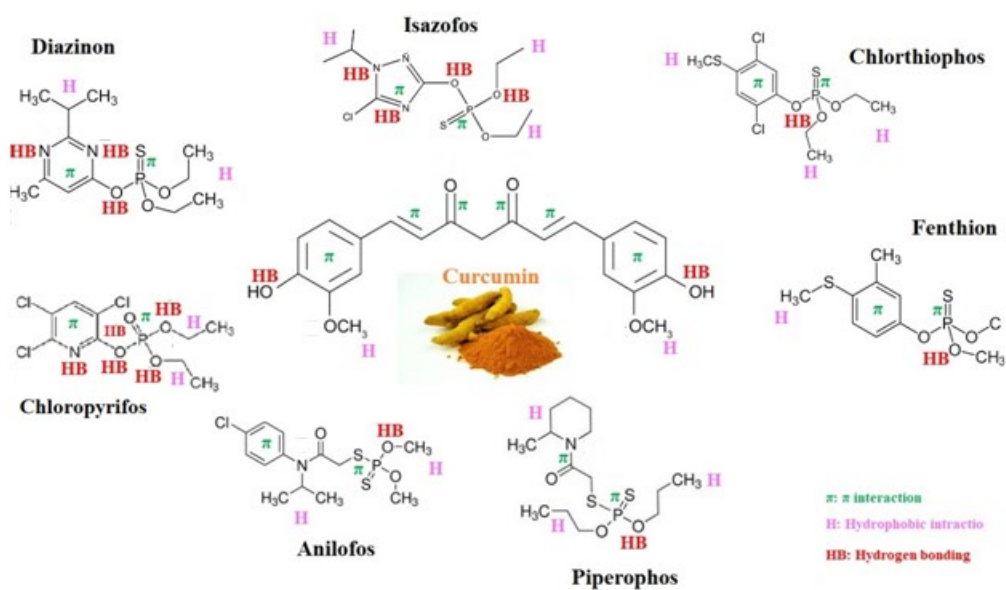

34

35

Fig. S1. The most probable interactions between curcumin and the analytes.

36
